# Supplementary material for: Knowledge and Practices of Hypoxemia Management in Rwandan Public Hospitals
Source: Research Square preprint supplement (doi:10.21203/rs.3.rs-7231097/v1), 2025-09-25
Supplement: Supplementary file 1 [file 17ff3240499b2a6bf13e8c4e.docx]

# S4 Appendix - Complete list of symptoms and diagnosis documented amongst the cohort of inpatients in Rwanda by clinical hypoxemia management outcomes

| **Patient Symptoms and Diagnoses** | **Patients admitted (N)** | **Received pulse ox on admission (n)** | **Received pulse ox on admission (%)** | **Hypoxemic on admission (n)** | **Hypoxemic on admission of those screened (%)** | **Oxygen provided to hypoxemic on admission (n)** | **Oxygen provided to hypoxemic on admission (%)** |
| --- | --- | --- | --- | --- | --- | --- | --- |
| **Symptom (Neonates)** | | | | | | | |
| Respiratory Distress | 117 | 112 | 95.7 | 67 | 59.82 | 66 | 98.5 |
| Chest Indrawing | 51 | 51 | 100.0 | 37 | 72.55 | 36 | 97.3 |
| Vomiting / Difficulty feeding | 51 | 49 | 96.1 | 8 | 16.33 | 8 | 100.0 |
| Cough | 37 | 37 | 100.0 | 15 | 40.54 | 15 | 100.0 |
| Altered Consciousness | 31 | 30 | 96.8 | 17 | 56.67 | 16 | 94.1 |
| Fever | 30 | 30 | 100.0 | 7 | 23.33 | 7 | 100.0 |
| Urogenital / Obstetrics | 11 | 11 | 100.0 | 2 | 18.18 | 2 | 100.0 |
| Hypothermia | 5 | 4 | 80.0 | 0 | 0.00 |  |  |
| Diarrhea | 4 | 4 | 100.0 | 1 | 25.00 | 1 | 100.0 |
| Musculoskeletal | 4 | 4 | 100.0 | 0 | 0.00 |  |  |
| Mental health/Substance Abuse | 2 | 1 | 50.0 | 1 | 100.00 | 1 | 100.0 |
| Shock | 1 | 1 | 100.0 | 1 | 100.00 | 1 | 100.0 |
| Weakness | 1 | 1 | 100.0 | 0 | 0.00 |  |  |
| Cardiovascular | 1 | 1 | 100.0 | 1 | 100.00 | 1 | 100.0 |
| Dehydration / Electrolyte Imbalance | 1 | 1 | 100.0 | 0 | 0.00 |  |  |
| Abdominal | 1 | 1 | 100.0 | 0 | 0.00 |  |  |
| **Symptom (Pediatrics)** | | | | | | | |
| Fever | 265 | 254 | 95.8 | 43 | 16.93 | 42 | 97.7 |
| Diarrhea | 256 | 247 | 96.5 | 4 | 1.62 | 4 | 100.0 |
| Cough | 182 | 176 | 96.7 | 68 | 38.64 | 66 | 97.1 |
| Vomiting / Difficulty feeding | 158 | 154 | 97.5 | 5 | 3.25 | 5 | 100.0 |
| Musculoskeletal | 46 | 23 | 50.0 | 1 | 4.35 | 1 | 100.0 |
| General pain | 40 | 39 | 97.5 | 1 | 2.56 | 1 | 100.0 |
| Altered Consciousness | 30 | 29 | 96.7 | 3 | 10.34 | 2 | 66.7 |
| Respiratory Distress | 30 | 27 | 90.0 | 14 | 51.85 | 14 | 100.0 |
| Urogenital / Obstetrics | 25 | 22 | 88.0 | 0 | 0.00 |  |  |
| Chest Indrawing | 18 | 18 | 100.0 | 11 | 61.11 | 11 | 100.0 |
| Headache | 9 | 9 | 100.0 | 4 | 44.44 | 2 | 50.0 |
| Mental health/Substance Abuse | 8 | 6 | 75.0 | 0 | 0.00 |  |  |
| Weakness | 4 | 4 | 100.0 | 0 | 0.00 |  |  |
| Shock | 3 | 3 | 100.0 | 1 | 33.33 | 1 | 100.0 |
| Skin abscess / rash | 2 | 2 | 100.0 | 0 | 0.00 |  |  |
| Mouth/ Speech / Throat | 2 | 2 | 100.0 | 0 | 0.00 |  |  |
| Cardiovascular | 2 | 1 | 50.0 | 0 | 0.00 |  |  |
| Abdominal | 1 | 1 | 100.0 | 0 | 0.00 |  |  |
| Dehydration / Electrolyte Imbalance | 1 | 1 | 100.0 | 0 | 0.00 |  |  |
| **Symptom (Adult)** | | | | | | | |
| Urogenital / Obstetrics | 1103 | 943 | 85.5 | 4 | 0.42 | 3 | 75.0 |
| General pain | 491 | 431 | 87.8 | 11 | 2.55 | 9 | 81.8 |
| Fever | 145 | 137 | 94.5 | 21 | 15.33 | 21 | 100.0 |
| Cough | 126 | 124 | 98.4 | 62 | 50.00 | 59 | 95.2 |
| Mental health/Substance Abuse | 116 | 104 | 89.7 | 2 | 1.92 | 1 | 50.0 |
| Musculoskeletal | 100 | 90 | 90.0 | 5 | 5.56 | 4 | 80.0 |
| Diarrhea | 82 | 79 | 96.3 | 5 | 6.33 | 4 | 80.0 |
| Vomiting / Difficulty feeding | 78 | 74 | 94.9 | 7 | 9.46 | 6 | 85.7 |
| Respiratory Distress | 52 | 50 | 96.2 | 33 | 66.00 | 31 | 93.9 |
| Altered Consciousness | 50 | 49 | 98.0 | 19 | 38.78 | 18 | 94.7 |
| Cardiovascular | 45 | 43 | 95.6 | 3 | 6.98 | 2 | 66.7 |
| Abdominal | 31 | 30 | 96.8 | 2 | 6.67 | 1 | 50.0 |
| Shock | 20 | 20 | 100.0 | 13 | 65.00 | 13 | 100.0 |
| Weakness | 19 | 17 | 89.5 | 1 | 5.88 | 1 | 100.0 |
| Chest Indrawing | 16 | 15 | 93.8 | 10 | 66.67 | 10 | 100.0 |
| Mouth/ Speech / Throat | 13 | 13 | 100.0 | 0 | 0.00 |  |  |
| Skin abscess / rash | 5 | 5 | 100.0 | 0 | 0.00 |  |  |
| Headache | 2 | 2 | 100.0 | 0 | 0.00 |  |  |
| Dehydration / Electrolyte Imbalance | 1 | 1 | 100.0 | 0 | 0.00 |  |  |
| Hypothermia | 1 | 1 | 100.0 | 0 | 0.00 |  |  |
| **Symptom (Unknown Age)** | | | | | | | |
| Urogenital / Obstetrics | 97 | 89 | 91.8 | 0 | 0.00 |  |  |
| General pain | 65 | 57 | 87.7 | 4 | 7.02 | 4 | 100.0 |
| Fever | 37 | 36 | 97.3 | 3 | 8.33 | 3 | 100.0 |
| Cough | 26 | 26 | 100.0 | 10 | 38.46 | 10 | 100.0 |
| Vomiting / Difficulty feeding | 17 | 17 | 100.0 | 1 | 5.88 | 1 | 100.0 |
| Diarrhea | 17 | 17 | 100.0 | 1 | 5.88 | 1 | 100.0 |
| Musculoskeletal | 14 | 13 | 92.9 | 0 | 0.00 |  |  |
| Mental health/Substance Abuse | 7 | 7 | 100.0 | 0 | 0.00 |  |  |
| Cardiovascular | 5 | 4 | 80.0 | 0 | 0.00 |  |  |
| Shock | 5 | 5 | 100.0 | 2 | 40.00 | 2 | 100.0 |
| Respiratory Distress | 4 | 4 | 100.0 | 3 | 75.00 | 3 | 100.0 |
| Abdominal | 3 | 3 | 100.0 | 0 | 0.00 |  |  |
| Altered Consciousness | 3 | 3 | 100.0 | 0 | 0.00 |  |  |
| Weakness | 3 | 3 | 100.0 | 0 | 0.00 |  |  |
| Chest Indrawing | 2 | 2 | 100.0 | 2 | 100.00 | 2 | 100.0 |
| Hypothermia | 1 | 1 | 100.0 | 0 | 0.00 |  |  |
| Dehydration / Electrolyte Imbalance | 1 | 0 | 0.0 |  |  |  |  |
| Headache | 1 | 1 | 100.0 | 0 | 0.00 |  |  |
| Mouth/ Speech / Throat | 1 | 1 | 100.0 | 0 | 0.00 |  |  |
| **Diagnosis (Neonate)** | | | | | | | |
| Preterm/ Low Birthweight | 228 | 224 | 98.2 | 58 | 25.89 | 58 | 100.0 |
| Encephalopathy | 93 | 90 | 96.8 | 52 | 57.78 | 50 | 96.2 |
| Sepsis | 92 | 92 | 100.0 | 29 | 31.52 | 29 | 100.0 |
| Neonatal Infection | 85 | 81 | 95.3 | 7 | 8.64 | 6 | 85.7 |
| Jaundice | 39 | 39 | 100.0 | 7 | 17.95 | 6 | 85.7 |
| Respiratory Distress Syndrome | 23 | 22 | 95.7 | 10 | 45.45 | 10 | 100.0 |
| Diabetes | 18 | 14 | 77.8 | 1 | 7.14 | 1 | 100.0 |
| Musculoskeletal | 14 | 13 | 92.9 | 3 | 23.08 | 3 | 100.0 |
| Gastro-Intestinal | 14 | 13 | 92.9 | 2 | 15.38 | 2 | 100.0 |
| Pneumonia | 12 | 12 | 100.0 | 7 | 58.33 | 7 | 100.0 |
| Injury/Trauma | 4 | 4 | 100.0 | 0 | 0.00 | 2 | 66.7 |
| Genetic disease | 4 | 4 | 100.0 | 3 | 75.00 | 3 | 100.0 |
| Cardiovascular/Stroke | 3 | 3 | 100.0 | 2 | 66.67 | 2 | 100.0 |
| Meningitis | 2 | 2 | 100.0 | 2 | 100.00 | 2 | 100.0 |
| Skin/Wounds | 2 | 2 | 100.0 | 0 | 0.00 |  |  |
| Urogenital | 2 | 2 | 100.0 | 0 | 0.00 |  |  |
| Malaria | 2 | 2 | 100.0 | 0 | 0.00 |  |  |
| Malnutrition | 2 | 2 | 100.0 | 1 | 50.00 | 1 | 100.0 |
| Coma/Seizure/Altered Consciousness | 1 | 1 | 100.0 | 0 | 0.00 |  |  |
| Mental Health/Neurological | 1 | 1 | 100.0 | 1 | 100.00 | 1 | 100.0 |
| Cancer/Cysts | 1 | 1 | 100.0 | 0 | 0.00 |  |  |
| Pulmonary | 1 | 1 | 100.0 | 0 | 0.00 |  |  |
| **Diagnosis (Pediatrics)** | | | | | | | |
| Pneumonia | 195 | 189 | 96.9 | 75 | 39.68 | 71 | 94.7 |
| Sepsis | 111 | 109 | 98.2 | 11 | 10.09 | 10 | 90.9 |
| Injury/Trauma | 104 | 91 | 87.5 | 3 | 3.30 | 2 | 66.7 |
| Gastro-Intestinal | 84 | 79 | 94.0 | 2 | 2.53 | 2 | 100.0 |
| Musculoskeletal | 74 | 36 | 48.6 | 1 | 2.78 | 1 | 100.0 |
| Malaria | 67 | 65 | 97.0 | 6 | 9.23 | 6 | 100.0 |
| Coma/Seizure/Altered Consciousness | 39 | 37 | 94.9 | 6 | 16.22 | 5 | 83.3 |
| Urogenital | 31 | 30 | 96.8 | 0 | 0.00 |  |  |
| Ear, Nose, Eye | 17 | 15 | 88.2 | 1 | 6.67 | 1 | 100.0 |
| Throat/Tonsillitis | 15 | 15 | 100.0 | 0 | 0.00 |  |  |
| Malnutrition | 14 | 14 | 100.0 | 0 | 0.00 |  |  |
| Anemia | 11 | 11 | 100.0 | 4 | 36.36 | 3 | 75.0 |
| Pulmonary | 10 | 10 | 100.0 | 1 | 10.00 | 1 | 100.0 |
| Skin/Wounds | 10 | 10 | 100.0 | 0 | 0.00 |  |  |
| Dehydration/Electrolyte Imbalance | 10 | 9 | 90.0 | 2 | 22.22 | 2 | 100.0 |
| Mental Health/Neurological | 10 | 8 | 80.0 | 0 | 0.00 |  |  |
| Cancer/Cysts | 9 | 8 | 88.9 | 0 | 0.00 |  |  |
| Diabetes | 7 | 7 | 100.0 | 2 | 28.57 | 2 | 100.0 |
| Meningitis | 6 | 6 | 100.0 | 0 | 0.00 |  |  |
| Typhoid | 5 | 5 | 100.0 | 1 | 20.00 | 1 | 100.0 |
| Encephalopathy | 4 | 4 | 100.0 | 1 | 25.00 | 1 | 100.0 |
| Cardiovascular/Stroke | 4 | 4 | 100.0 | 3 | 75.00 | 3 | 100.0 |
| Intoxication | 4 | 3 | 75.0 | 1 | 33.33 | 1 | 100.0 |
| Genetic disease | 4 | 4 | 100.0 | 1 | 25.00 | 1 | 100.0 |
| Influenza | 2 | 2 | 100.0 | 1 | 50.00 | 1 | 100.0 |
| Hypovolemic shock | 2 | 2 | 100.0 | 0 | 0.00 |  |  |
| Jaundice | 1 | 1 | 100.0 | 0 | 0.00 |  |  |
| HIV/AIDs | 1 | 1 | 100.0 | 0 | 0.00 |  |  |
| **Diagnosis (Adult)** | | | | | | | |
| Maternal/Childbirth | 1269 | 982 | 77.4 | 0 | 0.00 |  |  |
| Injury/Trauma | 461 | 413 | 89.6 | 14 | 3.39 | 11 | 78.6 |
| Urogenital | 283 | 226 | 79.9 | 11 | 4.87 | 9 | 81.8 |
| Gastro-Intestinal | 264 | 242 | 91.7 | 11 | 4.55 | 11 | 100.0 |
| Cardiovascular/Stroke | 165 | 155 | 93.9 | 27 | 17.42 | 27 | 100.0 |
| Mental Health/Neurological | 148 | 132 | 89.2 | 3 | 2.27 | 1 | 33.3 |
| Sepsis | 115 | 109 | 94.8 | 23 | 21.10 | 22 | 95.7 |
| Musculoskeletal | 112 | 96 | 85.7 | 2 | 2.08 | 2 | 100.0 |
| Pneumonia | 77 | 76 | 98.7 | 31 | 40.79 | 31 | 100.0 |
| Pulmonary | 74 | 71 | 95.9 | 42 | 59.15 | 35 | 83.3 |
| Malaria | 57 | 54 | 94.7 | 5 | 9.26 | 5 | 100.0 |
| Diabetes | 55 | 53 | 96.4 | 0 | 0.00 |  |  |
| Cancer/Cysts | 37 | 32 | 86.5 | 4 | 12.50 | 3 | 75.0 |
| Jaundice | 32 | 28 | 87.5 | 1 | 3.57 | 1 | 100.0 |
| Skin/Wounds | 29 | 26 | 89.7 | 2 | 7.69 | 1 | 50.0 |
| Anemia | 27 | 24 | 88.9 | 3 | 12.50 | 3 | 100.0 |
| Coma/Seizure/Altered Consciousness | 23 | 22 | 95.7 | 2 | 9.09 | 2 | 100.0 |
| HIV/AIDs | 21 | 20 | 95.2 | 6 | 30.00 | 6 | 100.0 |
| Ear, Nose, Eye | 15 | 11 | 73.3 | 0 | 0.00 |  |  |
| Meningitis | 10 | 10 | 100.0 | 4 | 40.00 | 4 | 100.0 |
| Tuberculosis | 9 | 8 | 88.9 | 1 | 12.50 | 1 | 100.0 |
| Intoxication | 8 | 8 | 100.0 | 1 | 12.50 | 1 | 100.0 |
| Malnutrition | 8 | 7 | 87.5 | 0 | 0.00 |  |  |
| Throat/Tonsillitis | 7 | 7 | 100.0 | 0 | 0.00 |  |  |
| Dehydration/Electrolyte Imbalance | 5 | 5 | 100.0 | 1 | 20.00 | 1 | 100.0 |
| Typhoid | 5 | 5 | 100.0 | 1 | 20.00 | 0 | 0.0 |
| Hypovolemic shock | 5 | 5 | 100.0 | 2 | 40.00 | 2 | 100.0 |
| COVID-19 | 4 | 4 | 100.0 | 1 | 25.00 | 1 | 100.0 |
| Genetic disease | 3 | 3 | 100.0 | 0 | 0.00 |  |  |
| Encephalopathy | 3 | 3 | 100.0 | 1 | 33.33 | 1 | 100.0 |
| Surgery | 3 | 3 | 100.0 | 0 | 0.00 |  |  |
| Polio | 1 | 0 | 0.0 |  |  |  |  |
| **Diagnosis (Unknown Age)** | | | | | | | |
| Maternal/Childbirth | 115 | 96 | 83.5 | 0 | 0.00 |  |  |
| Injury/Trauma | 66 | 61 | 92.4 | 4 | 6.56 | 4 | 100.0 |
| Gastro-Intestinal | 30 | 27 | 90.0 | 1 | 3.70 | 1 | 100.0 |
| Sepsis | 27 | 27 | 100.0 | 0 | 0.00 |  |  |
| Urogenital | 26 | 21 | 80.8 | 0 | 0.00 |  |  |
| Pneumonia | 21 | 21 | 100.0 | 9 | 42.86 | 9 | 100.0 |
| Cardiovascular/Stroke | 15 | 14 | 93.3 | 1 | 7.14 | 1 | 100.0 |
| Mental Health/Neurological | 15 | 14 | 93.3 | 0 | 0.00 |  |  |
| Malaria | 13 | 12 | 92.3 | 0 | 0.00 |  |  |
| Diabetes | 10 | 10 | 100.0 | 1 | 10.00 | 1 | 100.0 |
| Pulmonary | 10 | 10 | 100.0 | 2 | 20.00 | 2 | 100.0 |
| Musculoskeletal | 8 | 7 | 87.5 | 0 | 0 |  |  |
| Skin/Wounds | 5 | 4 | 80.0 | 0 | 0.00 |  |  |
| Jaundice | 5 | 5 | 100.0 | 0 | 0.00 |  |  |
| Coma/Seizure/Altered Consciousness | 3 | 3 | 100.0 | 0 | 0.00 |  |  |
| Cancer/Cysts | 3 | 3 | 100.0 | 0 | 0 |  |  |
| Preterm/ Low Birthweight | 3 | 3 | 100.0 | 0 | 0.00 |  |  |
| Neonatal Infection | 2 | 2 | 100.0 | 0 | 0.00 |  |  |
| Typhoid | 1 | 1 | 100.0 | 1 | 100.00 | 0 | 0.0 |
| Throat/Tonsillitis | 1 | 1 | 100.0 | 0 | 0.00 |  |  |
| Malnutrition | 1 | 1 | 100.0 | 0 | 0.00 |  |  |
| HIV/AIDs | 1 | 1 | 100.0 | 0 | 0.00 |  |  |
| Intoxication | 1 | 1 | 100.0 | 0 | 0 |  |  |
| COVID-19 | 1 | 1 | 100.0 | 0 | 0 |  |  |
| Hypovolemic shock | 1 | 1 | 100.0 | 0 | 0.00 |  |  |
| Surgery | 1 | 1 | 100.0 | 0 | 0.00 |  |  |
| Encephalopathy | 1 | 1 | 100.0 | 0 | 0.00 |  |  |
| Anemia | 1 | 1 | 100.0 | 0 | 0.00 |  |  |
| Ear, Nose, Eye | 1 | 1 | 100 | 0 | 0.00 |  |  |
| Rift Valley Fever | 1 | 1 | 100 | 0 | 0 |  |  |
