# Supplementary material for: Knowledge and Practices of Hypoxemia Management in Rwandan Public Hospitals
Source: Research Square preprint supplement (doi:10.21203/rs.3.rs-7231097/v1), 2025-09-25
Supplement: Supplementary file 2 [file 70ded9721bc7e88500a9f3ef.docx]

# S1 Appendix – Clinical note review tool

| **DATA COLLECTION** | | | |
| --- | --- | --- | --- |
| **NO.** | **QUESTION** | **RESPONSE CODE** | **SKIP** |
|  | **Survey Date** | ***--- --- / --- --- / --- --- --- ---*** *(dd/mm/yyyy)* |  |
|  | **Name of Data Collector** | …………………………………………… |  |

| **SECTION I: IDENTIFICATION** | | | |
| --- | --- | --- | --- |
| **NO.** | **QUESTION** | **RESPONSE CODE** | **SKIP** |
|  | **Facility name** | ……………………………………………  *(List of facilities)* |  |
|  | **Facility type** | District Hospital 1  Provincial Hospital 2  Referral/University Teaching Hospital 3  Specialized Hospital 4 |  |

| **SECTION II: PATIENT RECORD REVIEW BASIC INFORMATION** | | | |
| --- | --- | --- | --- |
| **NO.** | **QUESTION** | **RESPONSE CODE** | **SKIP** |
|  | **Date of admission**  *Format dd mm yyyy* | --- --- / --- --- / --- --- --- --- |  |
|  | **Final patient outcome** | Discharged 1  Died 2  Referred elsewhere (outside of this facility) 3  Absconded/Left against medical advice 4  Other -222  Information not recorded -999 |  |
| PC2B | **(Other) Final patient outcome**  *On the previous page you selected "Other" for the patient outcome. Please specify here.* | …………………………………………… |  |
|  | **PC3. Date of final outcome (discharge, referral, LAMA, referred elsewhere or death)**  **[A] Day (DD)**  **[B] Month (MM)**  **[C] Year (YYYY)**  *Enter -999 for Information not recorded* | [A] Day (DD) ___ ___  [B] Month (MM) ___ ___  [C] Year (YYYY) ___ ___ ___ ___ |  |
|  | **Patient date of birth**  **[A] Day (DD)**  **[B] Month (MM)**  **[C] Year (YYYY)**  *Enter -999 for Information not recorded* | [A] Day (DD) ___ ___  [B] Month (MM) ___ ___  [C] Year (YYYY) ___ ___ ___ ___ |  |
|  | **Age of the Patient in years**  *Enter the estimated age in completed years. For example, a child that is 1 year and 3 months old should be entered as ‘1’. A child that is less than 1 year old should be entered as ‘0’. Enter -999 for Information not recorded.* | Age in completed years ___ ___ |  |
|  | *If PC5=0:*  **Age of the Patient in months**  *Enter the estimated age in completed months. For example, a child that is 6 months and 10 days old should be entered as ‘6’. A child that is less than 1 month old should be entered as ‘0’. Enter -999 for Information not recorded.* | Age in months ___ ___ |  |
|  | **Sex of the Patient** | Male 1  Female 2  Information not recorded -999 |  |

| **SECTION III: DAY 0** | | | |
| --- | --- | --- | --- |
| **Instructions:** In this next section, you will collect information about the initial assessment, patient history, and treatment on the first day the patient was seen at the facility (Day 0). Do not include information from other days. | | | |
| 1. A | **Please select the Department the patient was admitted to on Day 0.**  *If the patient was transferred from one ward/department to another on this day, please tick both that apply.* | Neonatology 1  Pediatrics 2  Internal Medicine 3  Intensive Care Unit (ICU) 4  Emergency 5  Maternity 6  Gynecology and Obstetrics 7  Operation Theater 8  Surgery+Recovery 9  Isolation 10  Stomatology 11  Mental health 12  Ear Nose and Throat (ENT) 13  Outpatient Department (OPD) 14  Other -222 | 1-14 🡪 PC9  -222 🡪 PC8B |
| PC8B | **On the previous page you selected "Other" for the department. Please specify the department here.** | …………………………………………………………… |  |
|  | **Initial chief complaints and symptoms at admission (Day 0)**  *Mark all that apply.* | **FEVER**: fever, febrile illness, history of fever, chills, rigors, T>37.5 Celsius A  **COUGH/DIFFICULT BREATHING**: cough, difficult breathing, dyspnoea, short of breath (SOB), respiratory distress B  **CHEST INDRAWING**: chest indrawing/recession, lower chest wall indrawing/recession, intercostal indrawing/recession C  **SEVERE RESPIRATORY DISTRESS**: severe chest indrawing/recession, grunting, nasal flaring, head bobbing, central cyanosis, obstructed breathing D  **CONVULSIONS/ALTERED CONSCIOUS STATE**: lethargy, coma, drowsy, restless, irritable, confusion, altered GCS (Glasgow Coma Scale), seizures, convulsions, fits (or history of seizure/convulsion/fit) E  **SIGNS OF SHOCK**: weak pulse, thready pulse, absent pulse, hypotension, slow/delayed capillary refill (CR>3 seconds) F  **TRAUMA/INJURY**: trauma, severe burns, severe injury, motor vehicle accident, drowning G  **UNABLE TO FEED/DRINK**: unable to feed, inadequate feeding, not feeding, repeated vomiting H  **DIARRHOEA**: I  **PAIN**: for example abdominal pain, back pain, chest pain J  **OTHER**: -222 |  |
|  | **Is there an SP02 reading from Day 0?** | Yes 1  No 0 | 1🡪PC11  0🡪PC14 |
|  | *If PC10=1:*  **How many times was SpO2 recorded on Day 0?** | Times measured ___ |  |
|  | *If PC11=1:*  **What was the SpO2 measurement?** | SpO2 measurement ___ ___ % |  |
|  | *If PC11>1:*  **What was the lowest and highest SpO2 measurements recorded?**  **[A] Lowest SpO2 measurement**  **[B] Highest SpO2 measurement** | [A] Lowest SpO2 ___ ___ %  [B] Highest SpO2 ___ ___ ___ % |  |
|  | **Was the patient prescribed oxygen?** | Yes 1  No 0 | 1🡪PC15  0🡪PC17 |
| 1. A | **What was the delivery method of oxygen?** | Nasal prongs / nasal catheter / nasopharyngeal catheter 1  Face mask with reservoir 2  Face mask without reservoir 3  CPAP / Non-invasive ventilation 4  Ventilator via endotracheal tube 5  Other (specify) -222  Information not recorded -999 | 1-5 🡪 PC16  -222🡪PC15B |
| PC15B | **(Other) What was the delivery method of oxygen?**  *On the previous page you selected "Other" for the oxygen delivery method. Please specify here.* | …………………………………………………………… |  |
|  | **What flowrate was prescribed (in litres per min)?**  *If more than one flow rate is recorded, use the highest flow rate recorded.*  *Enter -999 for Information not recorded* | Flow rate ___ ___ L/min |  |
| 1. A | **Initial/provisional diagnoses at admission (Day 0)**  *Mark all that apply.* | **NEONATE (<1 month)**  **PRETERM/SMALL:** Preterm (<37 weeks gestation), Small (<2500g)  **SEPSIS:** sepsis, suspected sepsis, pneumonia, skin sepsis, etc.  **ENCEPHALOPATHY:** neonatal encephalopathy (NE), birth asphyxia, etc.  **JAUNDICE:** neonatal jaundice, kernicterus  **CHILD 1 month to 14 years (or similar)**  **MALARIA:** malaria, severe malaria, cerebral malaria, complicated malaria, etc.  **PNEUMONIA:** pneumonia, severe pneumonia, acute lower respiratory infection (ALRI), lower respiratory tract infection (LRTI), bronchiolitis, aspiration pneumonia, etc.  **DIARRHOEA:** diarrhoea, gastroenteritis (GE), infective diarrhoea, etc.  **SEPSIS:** sepsis, suspected sepsis, etc.  **MENINGITIS:** meningitis, encephalitis, etc.  **MALNUTRITION:** severe acute malnutrition (SAM), moderate acute malnutrition (MAM), marasmus, kwashiakor, wasting, stunting, etc.  **ANAEMIA:** anaemia  **TRAUMA/INJURY:** trauma, severe burns, severe injury, motor vehicle accident, drowning, etc.  **HIV/AIDS:** HIV positive, HIV complication  **COVID-19:** coronavirus, COVID-19, etc.  **ADULT / ADOLESCENT, 15+ (or similar)**  **MALARIA:** malaria, severe malaria, cerebral malaria, complicated malaria, etc.  **PNEUMONIA:** pneumonia, severe pneumonia, acute lower respiratory infection (ALRI), lower respiratory tract infection (LRTI), bronchiolitis, aspiration pneumonia, etc.  **SEPSIS:** sepsis, suspected sepsis, etc.  **TRAUMA/INJURY:** trauma, severe burns, severe injury, motor vehicle accident, drowning, etc.  **MYOCARDIAL INFARCTION:** heart attack, heart failure  **COVID-19:** coronavirus, COVID-19, etc.  **PULMONARY DISEASE:** COPD, asthma  **GASTROINTESTINAL:** gastritis, gastro-oesophageal reflux disorder (GORD/GOR/GERD/GER), peptic ulcer disease (PUD), etc.  **UROGENITAL:** urinary tract infection (UTI), pelvic inflammatory disease (PID)  **HIV/AIDS :** HIV positive, HIV complication | -222🡪PC17B |
| PC17B | **Other diagnoses at admission (Day 0)**  *On the previous page you selected "Other" for the diagnosis. Please specify here.* |  |  |

| **SECTION IV: DAY 1** | | | |
| --- | --- | --- | --- |
| **Instructions:** In this next section, you will collect information from the day after admission (Day 1). For example if the day on which the patient was first admitted to the facility (Day 0) is September 1, 2022, then Day 1 is September 2, 2022. Do not include information from other days. | | | |
|  | **Are there case notes for Day 1 (day after date of patient admission)?** | Yes 1  No 0 | 1🡪PC18  0🡪PC26 |
| 1. A | **Please select the Department the patient was admitted to on Day 1.** | Neonatology 1  Pediatrics 2  Internal Medicine 3  Intensive Care Unit (ICU) 4  Emergency 5  Maternity 6  Gynecology and Obstetrics 7  Operation Theater 8  Surgery+Recovery 9  Isolation 10  Stomatology 11  Mental health 12  Ear Nose and Throat (ENT) 13  Outpatient Department (OPD) 14  Other -222 | 1-14🡪PC20  -222🡪PC19B |
| PC19B | **On the previous page you selected "Other" for the department. Please specify the department here.** | …………………………………………………………… |  |
|  | **Is there an SP02 reading from Day 1?** | Yes 1  No 0 | 1🡪PC21  0🡪PC24 |
|  | **How many times was SpO2 recorded on Day 1?** | Times measured ___ |  |
|  | *If PC21=1:*  **What was the SpO2 measurement?** | SpO2 measurement ___ ___ ___ % |  |
|  | *If PC21>1:*  **What was the lowest and highest SpO2 measurements recorded?**  **[A] Lowest SpO2 measurement**  **[B] Highest SpO2 measurement** | [A] Lowest SpO2 ___ ___ ___ %  [B] Highest SpO2 ___ ___ ___ % |  |
|  | **Was the patient prescribed oxygen?** | Yes 1  No 0 | 1🡪PC25  0🡪PC27 |
|  | **What was the delivery method of oxygen?** | Nasal prongs / nasal catheter / nasopharyngeal catheter 1  Face mask with reservoir 2  Face mask without reservoir 3  CPAP / Non-invasive ventilation 4  Ventilator via endotracheal tube 5  Other (specify) -222  Information not recorded -999 |  |
|  | **What flowrate was prescribed (in litres per min)?**  *If more than one flow rate is recorded, use the highest flow rate recorded.*  *Enter -999 for Information not recorded* | Flow rate ___ ___ L/min |  |

| **SECTION V: LAST DAY** | | | |
| --- | --- | --- | --- |
| **Instructions:** In this next section, you will collect information from the last day the patient was admitted. The last day of admission is the day the patient was discharged, passed away, or referred out. Do not include information from other days. | | | |
|  | **Are there case notes from the last day of admission?** | Yes 1  No 0 | 1🡪PC28  0🡪END |
| 1. A | **Please select the Department of the patient on the last day of their admission.** | Neonatology 1  Pediatrics 2  Internal Medicine 3  Intensive Care Unit (ICU) 4  Emergency 5  Maternity 6  Gynecology and Obstetrics 7  Operation Theater 8  Surgery+Recovery 9  Isolation 10  Stomatology 11  Mental health 12  Ear Nose and Throat (ENT) 13  Outpatient Department (OPD) 14  Other -222 | 1-14🡪PC29  -222🡪PC28B |
| PC28B | **On the previous page you selected "Other" for the department. Please specify the department here.** | …………………………………………………………… |  |
|  | **Is there an SP02 reading from last day of admission?** | Yes 1  No 0 | 1🡪PC30  0🡪PC33 |
|  | **How many times was SpO2 recorded on the last day of admission?** | Times measured ___ |  |
|  | *If PC30=1:*  **What was the SpO2 measurement?** | SpO2 measurement ___ ___ ___ % |  |
|  | *If PC31>1:*  **What was the lowest and highest SpO2 measurements recorded?**  **[A] Lowest SpO2 measurement**  **[B] Highest SpO2 measurement** | [A] Lowest SpO2 ___ ___ ___ %  [B] Highest SpO2 ___ ___ ___ % |  |
|  | **Was the patient prescribed oxygen?** | Yes 1  No 0 | 1🡪PC31  0🡪END |
| 1. A | *If PC30=1:*  **What was the delivery method of oxygen?** | Nasal prongs / nasal catheter / nasopharyngeal catheter 1  Face mask with reservoir 2  Face mask without reservoir 3  CPAP / Non-invasive ventilation 4  Ventilator via endotracheal tube 5  Other (specify) -222  Information not recorded -999 |  |
| PC34B | **PC34B. (Other) What was the delivery method of oxygen?**  *On the previous page you selected "Other" for the oxygen delivery method. Please specify here.* | …………………………………………………………… |  |
|  | *If PC30=1:*  **What flowrate was prescribed (in litres per min)?**  *If more than one flow rate is recorded, use the highest flow rate recorded.*  *Enter -999 for Information not recorded* | Flow rate ___ ___ L/min |  |
|  |  |  |  |
| Comment | *Is there any other comment you would like to share about clinical practices/patients'care in this facility or about this survey? You can write it here (Optional)* |  | |
