# Supplementary material for: Knowledge and Practices of Hypoxemia Management in Rwandan Public Hospitals
Source: Research Square preprint supplement (doi:10.21203/rs.3.rs-7231097/v1), 2025-09-25
Supplement: Supplementary file 3 [file 7e16f674870a6653a82009db.docx]

# S3 Appendix Patient outcomes in those admitted to non-acute wards during the study window

| **Wards of admission** | **Patients admitted (N)** | **Received pulse ox on admission (n)** | **Received pulse ox on admission (%)** | **Hypoxemic on admission (n)** | **Hypoxemic on admission of those screened (%)** | **Oxygen provided to hypoxemic on admission (n)** | **Oxygen provided to hypoxemic on admission (%)** |
| --- | --- | --- | --- | --- | --- | --- | --- |
| Mental Health | 47 | 41 | 87.2 | 0 | 0.0 |  |  |
| Physiotherapy & Prosthetics | 44 | 3 | 6.8 | 0 | 0.0 |  |  |
| Ear, Nose, Throat & Eye | 19 | 8 | 42.1 | 1 | 12.5 | 1 | 100.0 |
| Neurology | 12 | 9 | 75.0 | 1 | 11.1 | 1 | 100.0 |
| Urology | 2 | 2 | 100.0 | 0 | 0.0 |  |  |
| Stomatology | 1 | 1 | 100.0 | 0 | 0.0 |  |  |
| Isolation | 1 | 1 | 100.0 | 0 | 0.0 |  |  |
