# Supplementary material for: Knowledge and Practices of Hypoxemia Management in Rwandan Public Hospitals
Source: Research Square preprint supplement (doi:10.21203/rs.3.rs-7231097/v1), 2025-09-25

# S2 Appendix - Healthcare Worker Survey

1. Does a pulse oximeter measure heart rate?
2. Does a pulse oximeter measure hemoglobin (Hb)?
3. Does a pulse oximeter measure blood pressure?
4. Is hypoxemia defined as an oxygen saturation below 90%?
5. Does oxygen saturation only become seriously low when it falls under 75%?
6. Should oxygen be given when a pulse oximeter is not available in children with clinical signs?
7. Should oxygen be given to children with pneumonia?
8. Should oxygen be given to children with SpO2 below 95% and clinical signs?
9. In a 9-month-old with convulsions, is it an emergency requiring urgent help and oxygen?


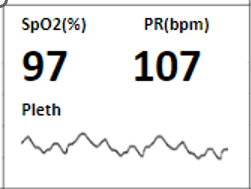


1. In a 2-year-old with fast breathing and low SpO2, should oxygen be started?


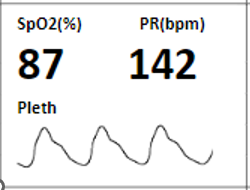


1. In a 12-month-old with cough and fever and a poor plethysmograph waveform, should the reading be checked and repeated?


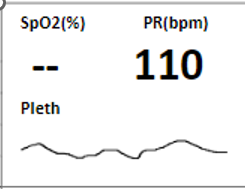


1. If a 1700g neonate on oxygen has a high SpO2, should the oxygen flow rate be reduced?


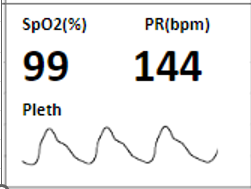

Supplement: Supplementary file 4 [file cd7531ae623b29b3eaeb6a88.docx]
